# Supplementary material for: Tracing the Spread of Clostridium difficile Ribotype 027 in Germany Based on Bacterial Genome Sequences
Source: PLoS One. 2015 Oct 7;10(10):e0139811. doi: 10.1371/journal.pone.0139811 (PMC4596877; doi:10.1371/journal.pone.0139811)
Supplement: S5 Table — Level of statistical support for individual spreading events. (XLSX) [file pone.0139811.s008.xlsx]

## Sheet: Tabelle1
Supplementary Table S5. Results of BSSVS analyses
Modell:	16 Regions, relaxed clock, constant size coalescent, 3 combined runs, 15 % burnin, 6e7 generations, 10000 samples
BF cutoff*:	3.0
mean Poisson Prior*:	0.6931471805599453
Poisson Prior offset*:	15.0
Bayes factor*	Transition
303	UK and Canada
369	UK and SaarlandTrier
356	UK and ThuringiaSchweinfurt
324	UK and Augsburg
297	Switzerland and Saxony
294	MetropolitanAreaAreaStuttgart and Augsburg
372	RhineNeckar and Saxony
355	MetropolitanAreaRhineRuhr and OstwestfalenLippe
365	Dillenburg and MetropolitanAreaRhineRuhr
Modell:	22 Regions, relaxed clock, constant size coalescent, 3 combined runs, 15 % burnin, 6e7 generations, 10000 samples
BF cutoff*:	3.0
mean Poisson Prior*:	0.6931471805599453
Poisson Prior offset*:	21.0
Bayes factor*	Transition
30	UK and MetropolitanAreaAreaStuttgart
29	Switzerland and Leipzig
26	UK and Augsburg
28	UK and Canada
27	MetropolitanAreaAreaStuttgart and Saarland
25	MetropolitanAreaAreaStuttgart and Augsburg
20	MetropolitanAreaRhineRuhr and Schweinfurt
25	MetropolitanAreaRhineRuhr and OstwestfalenLippe
26	Dillenburg and MetropolitanAreaRhineRuhr
28	Dillenburg and FrankfurtRhineMain
28	RhineNeckar and MeissenDistrict
23	BadLangensalza and Ritschenhausen
306	BadBerka and Zittau
29	Leipzig and MeissenDistrict
Level of statistical support for individual directed spreading events
	*BSSVS Results generated by SPREAD
	Spatial Phylogenetic Reconstruction of Evolutionary Dynamics
	Version 1.0.6
	2013 Filip Bielejec, Andrew Rambaut, Marc A. Suchard & Philippe Lemey
